# Supplementary material for: Modeling the high-resolution dynamic exposure to flooding in a city region
Source: Copernicus journal article supplement (doi:10.5194/hess-23-3353-2019), 2019-08-14
Supplement: Supplementary file 1 [file hess-23-3353-2019-supplement.pdf]

Supplement of Hydrol. Earth Syst. Sci., 23, 3353–3372, 2019  
<https://doi.org/10.5194/hess-23-3353-2019-supplement>  
© Author(s) 2019. This work is distributed under  
the Creative Commons Attribution 4.0 License.

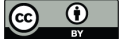

*Supplement of*

## **Modeling the high-resolution dynamic exposure to flooding in a city region**

**Xuehong Zhu et al.**

*Correspondence to:* Qiang Dai (qd\_gis@163.com) and Shuliang Zhang (zhangshuliang@njnu.edu.cn)

The copyright of individual parts of the supplement might differ from the CC BY 4.0 License.

# Questionnaire about Residents' Daily Trip and Flood Risk Perception

## Part one: Your basic information

1. Please indicate your gender, age, employment status, and education level:

## Part two: Daily trip description

2. Please write the following information about your main activities during a **weekday**.

| No. | Time period | Travel mode | Trip purpose | No. | Time period | Travel mode | Trip purpose |
|-----|-------------|-------------|--------------|-----|-------------|-------------|--------------|
| 1   | _____       | _____       | _____        | 6   | _____       | _____       | _____        |
| 2   | _____       | _____       | _____        | 7   | _____       | _____       | _____        |
| 3   | _____       | _____       | _____        | 8   | _____       | _____       | _____        |
| 4   | _____       | _____       | _____        | 9   | _____       | _____       | _____        |
| 5   | _____       | _____       | _____        | 10  | _____       | _____       | _____        |

3. Please write the following information about your main activities during a **weekend**.

| No. | Time period | Travel mode | Trip purpose | No. | Time period | Travel mode | Trip purpose |
|-----|-------------|-------------|--------------|-----|-------------|-------------|--------------|
| 1   | _____       | _____       | _____        | 6   | _____       | _____       | _____        |
| 2   | _____       | _____       | _____        | 7   | _____       | _____       | _____        |
| 3   | _____       | _____       | _____        | 8   | _____       | _____       | _____        |
| 4   | _____       | _____       | _____        | 9   | _____       | _____       | _____        |
| 5   | _____       | _____       | _____        | 10  | _____       | _____       | _____        |

## Part three: Flood risk perception

4. Have you experienced flood disaster before?

Yes, more than 3 times.

No, never.

Yes, 1-3 times.

5. When the rainstorm comes, you will:

Continue the originally planned activities

Postpone the originally planned activities

Cancel the originally planned activities

Others: \_\_\_\_\_

6. When the flood comes, you will:

Continue the originally planned activities

Postpone the originally planned activities

Cancel the originally planned activities

Others: \_\_\_\_\_

7. Have you received any warning information about floods?

Yes, more than 3 times.

No, never.

Yes, 1-3 times.

8. When you receive the warning information about floods, you will:

Continue the originally planned activities

Postpone the originally planned activities

Cancel the originally planned activities

Others: \_\_\_\_\_
